# Supplementary material for: Hard-Bottom Megabenthic Communities of a Chilean Fjord System: Sentinels for Climate Change?
Source: Frontiers journal article supplement (doi:10.3389/fmars.2021.635430), 2021-07-26
Supplement: Data_Sheet_2.docx [file Data_Sheet_2.docx]

**SM2.** Comprehensive list of the species identified in this study.

| **Phylum** | **Species** |
| --- | --- |
|
| Porifera | *Clathrina fiordica* |
|  | *Leucettusa nuda* |
|  | Demospongiae 1 |
|  | Demospongiae 2 |
|  | Demospongiae 3 |
|  | Demospongiae 4 |
|  | Demospongiae 5 |
|  | Demospongiae 6 |
|  | Demospongiae 8 |
|  | Demospongiae 10 |
|  | Demospongiae 11 |
|  | Demospongiae 14 |
|  | Demospongiae 15 |
|  | Demospongiae 16 |
|  | Demospongiae 17 |
|  | Encrusting Porifera |
|  | *Axinella crinita* |
|  | *Dragmacidon egregium* |
|  | *Halicnemia papillosa* |
|  | *Bubaris murrayi* |
|  | *Cliona chilensis* |
|  | *Dysidea tenuifibra* |
|  | *Haliclona spinosella* |
|  | *Oceanapia guaiteca* |
|  | *Iophon proximum* |
|  | *Lissodendoryx patagonica* |
|  | *Crambe chilensis* |
|  | *Latrunculia ciruela* |
|  | *Clathria amabilis* |
|  | *Myxilla chilensis* |
|  | *Phelloderma radiatum* |
|  | *Neopodospongia tupecomareni* |
|  | *Trachytedania spinata* |
|  | *Scopalina* sp. |
|  | *Tethya melinka* |
| Cnidaria | Hydrozoa spp. |
|  | *Hydractinia pacifica* |
|  | *Hybocodon chilensis* |
|  | Tubularidae 1 |
|  | *Plumularia setacea* |
|  | *Symplectoscyphus* sp. |
|  | *Synthecium protectum* |
|  | *Clavularia magelhaenica* |
|  | *Incrustatus comauensis* |
|  | *Alcyonium* sp. |
|  | *Primnoella chilensis* |
|  | *Thouarella* cfr. *variabilis* |
|  | Actiniaria 1 |
|  | Actiniaria 2 |
|  | Actiniaria 3 |
|  | *Bolocera* sp. |
|  | *Gonactinia prolifera* |
|  | *Metridium* cfr. *senile* |
|  | *Anthothoe chilensis* |
|  | *Corynactis* sp. |
|  | *Caryophyllia huinayensis* |
|  | *Desmophyllum dianthus* |
|  | *Epizoanthus* sp. |
| Mollusca | *Callochiton puniceus* |
|  | *Chiton bowenii* |
|  | *Chiton* sp. |
|  | *Tonicia* sp. |
|  | Gastropoda 2 |
|  | Gastropoda 3 |
|  | Gastropoda 4 |
|  | Gastropoda 5 |
|  | Gastropoda 6 |
|  | *Fissurella oriens* |
|  | *Fissurella picta* |
|  | *Nacella* sp. |
|  | *Calliostoma consimile* |
|  | *Crepipatella dilatata* |
|  | *Argobuccinum pustulosum* |
|  | *Fusitriton magellanicus* |
|  | *Aeneator fontainei* |
|  | *Acanthina monodon* |
|  | *Trophon* sp. |
|  | *Nassarius gayii* |
|  | Nudibranchia 1 |
|  | *Cadlina sparsa* |
|  | *Tyrinna delicata* |
|  | *Flabellina falklandica* |
|  | *Tritonia challengeriana* |
|  | *Tegula atra* |
|  | Gastropoda n.d. |
|  | *Mulinia* sp. |
|  | *Aulacomya atra* |
|  | *Mytilus platensis* |
|  | *Zygochlamys patagonica* |
|  | *Ameghinomya antiqua* |
| Annelida | *Spiochaetopterus* sp. |
|  | *Chaetopterus variopedatus* |
|  | *Eulalia* sp. |
|  | *Notaulax phaeotaenia* |
|  | Sabellidae n.d. |
|  | Serpulidae n.d. |
|  | Spirorbinae n.d. |
| Arthropoda | Sessilia 1 |
|  | *Elminius kingii* |
|  | *Pagurus comptus* |
| Bryozoa | Encrusting Bryozoa |
|  | *Adeonella* sp. |
|  | *Aspidostoma giganteum* |
|  | *Cellaria* sp. |
|  | *Reteporella magellensis* |
| Brachiopoda | *Magellania venosa* |
|  | Brachiopoda 1 |
| Echinodermata | Asteroidea 1 |
|  | Asteroidea 2 |
|  | Asteroidea 3 |
|  | *Anasterias antarctica* |
|  | *Cosmasterias lurida* |
|  | *Henricia* sp. |
|  | *Asterina fimbriata* |
|  | *Cycethra verrucosa* |
|  | *Ganeria falklandica* |
|  | *Odontaster penicillatus* |
|  | *Glabraster antarctica* |
|  | *Poraniopsis echinaster* |
|  | *Solaster regularis* |
|  | *Pteraster gibber* |
|  | *Arbacia dufresnii* |
|  | *Loxechinus albus* |
|  | *Pentactella leonina* |
|  | *Chiridota pisanii* |
|  | *Heterocucumis godeffroyi* |
|  | *Pseudocnus sp.* |
|  | *Psolus* sp. |
|  | *Astrotoma agassizi* |
|  | *Gorgonocephalus chilensis* |
|  | *Ophiuroglypha lymani* |
| Chordata | *Didemnum studeri* |
|  | *Sycozoa* sp. |
|  | *Aplidium* sp. 1 |
|  | Styelidae 1 |
|  | Styelidae 2 |
|  | *Cnemidocarpa* sp. |
